# Supplementary material for: Element ∕ Ca ratios in Nodosariida (Foraminifera) and their potential application for paleoenvironmental reconstructions
Source: Copernicus journal article supplement (doi:10.5194/bg-20-4043-2023), 2023-10-04
Supplement: Supplementary file 1 [file bg-20-4043-2023-supplement.pdf]

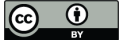

*Supplement of*

## **Element / Ca ratios in Nodosariida (Foraminifera) and their potential application for paleoenvironmental reconstructions**

**Laura Pacho et al.**

*Correspondence to:* Laura Pacho ([laura.pacho.sampedro@nioz.nl](mailto:laura.pacho.sampedro@nioz.nl))

The copyright of individual parts of the supplement might differ from the article licence.

## 1. Quality data check.

To test the potential effect of contaminant phases on the reported Mg/Ca and Na/Ca dependencies on salinity and temperature, we tested for correlations between Mn/Ca versus Mg/Ca, Al/Ca versus Mg/Ca, and Sr/Ca versus Mg/Ca. Both the species combined, as well as the species individually, show for Mg and Mn no correlation between any of the El/Ca combinations, and for all the data shew Sr stable incorporation.

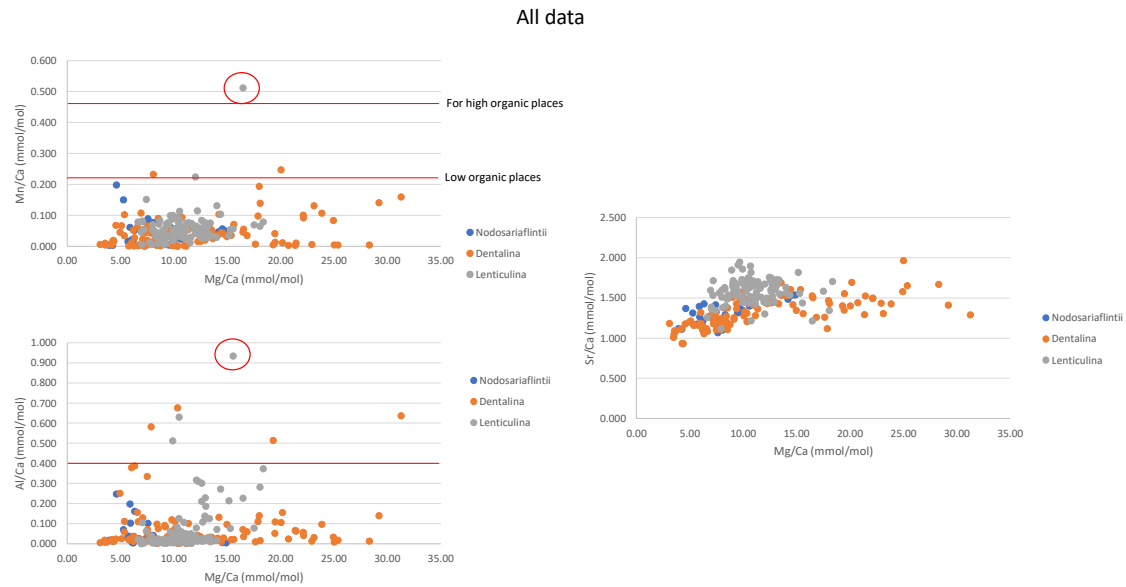

Figure S1: Correlations for Mn/Ca, Al/Ca, and Sr/Ca versus Mg/Ca for the three species analysed, and plotted against temperature and salinity.

*Lenticulina calcar*

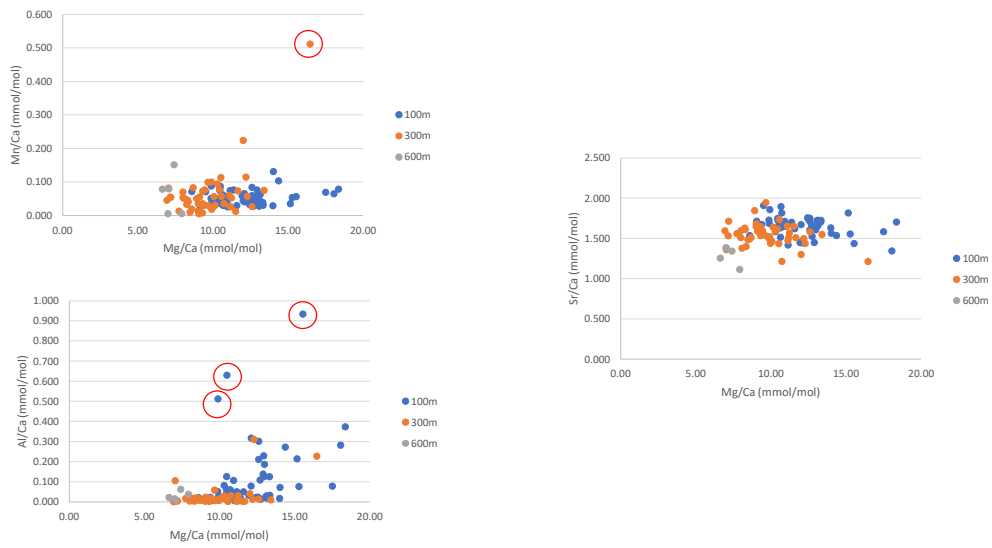

Figure S2: same variable plotted before, but in this case for the same species (*Lenticulina calcar*) to observe if there were correlations within the same depth.

*Nodosaria flintii*

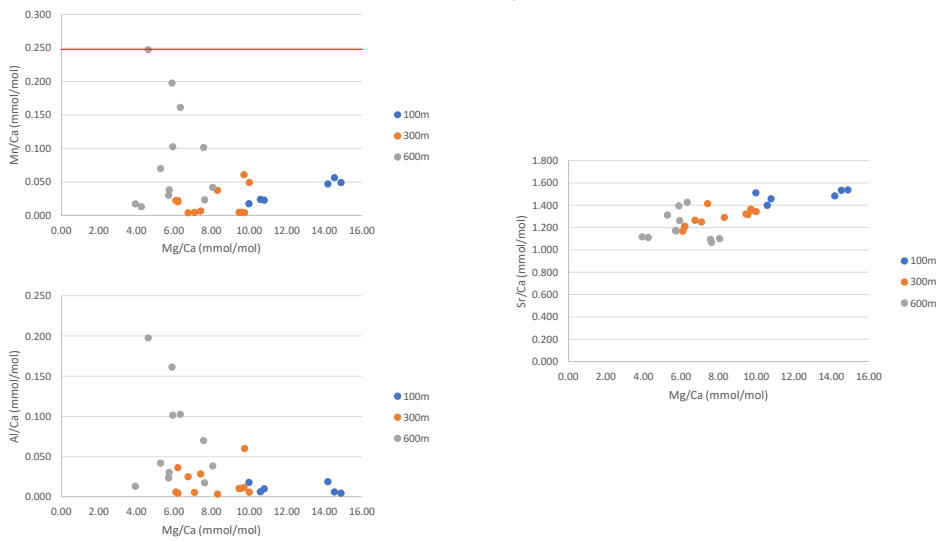

Figure S3: same variable plotted before, but in this case for the same specie (*Nodosaria flintii*) to observe if there were correlations within the same depth.

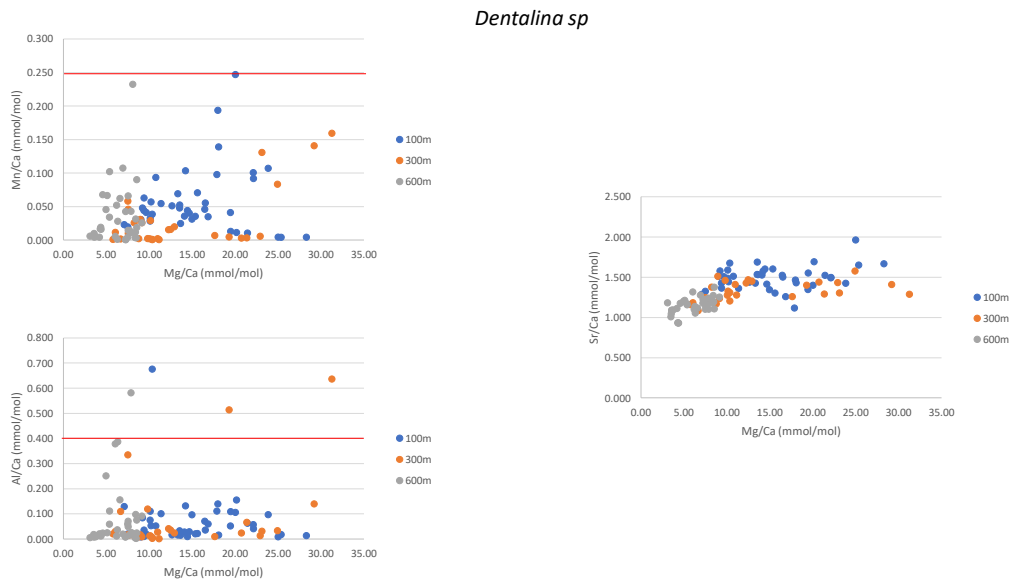

Figure S4: same variable plotted before, but in this case for the same specie (*Dentalina spp.*) to observe if there were correlations within the same depth.

2. Statistical analysis of the variability in El/Ca between species.

| Depth (m) | Mg/Ca | <i>Dentalina spp.</i> t-test | <i>Lenticulina calcar</i> t-test | <i>Nodosaria flintii</i> t-test |
|-----------|-------|------------------------------|----------------------------------|---------------------------------|
| 104.7     |       | p-value > 0.05               | All living                       | p-value > 0.05                  |
| 271.64    |       | p-value < 0.05               | All living                       | Non-living                      |
| 618.8     |       | p-value > 0.05               | Non-living                       | Non-living                      |
|           |       |                              |                                  |                                 |
| Depth (m) | Na/Ca | <i>Dentalina spp.</i> t-test | <i>Lenticulina calcar</i> t-test | <i>Nodosaria flintii</i> t-test |
| 104.7     |       | p-value > 0.05               | All living                       | p-value > 0.05                  |
| 271.64    |       | p-value < 0.05               | All living                       | Non-living                      |
| 618.8     |       | p-value < 0.05               | Non-living                       | Non-living                      |

Table S1: Variability between living (when there were rB foraminifera) and non-living foraminifera were grouped by depth for the three species plotted against temperature and salinity in the manuscript, using a t-test with different variances.

| Depth (m) | <i>L. calcar</i> vs <i>L. denticulifera</i> (t-test 2 tailed) | <i>L. calcar</i> vs <i>L. denticulifera</i> (t-test 2 tailed) |
|-----------|---------------------------------------------------------------|---------------------------------------------------------------|
|           | Mg/Ca (mmol/mol)                                              | Na/Ca (mmol/mol)                                              |
| 104.7     | p-value < 0.05                                                | p-value > 0.05                                                |
| 271.6     | p-value > 0.05                                                | p-value < 0.05                                                |

Table S2: Variability between 2 species from the same genus in their Mg/Ca and Na/Ca grouped by depth using a t-test with different variances.

3. Closest SEM pictures of the aperture of the foraminifera.

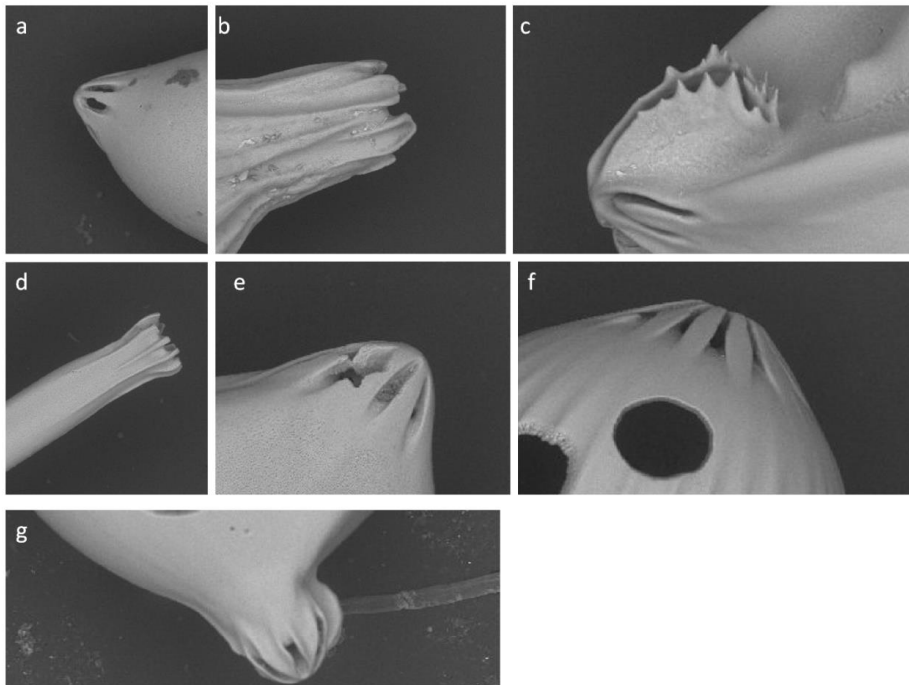

Figure S5: Closest picture of the aperture for some of the different specimens shown in the manuscript. (a): *Dentalina* spp.; (b) *Nodosaria flintii*; (c) *Lenticulina calcar*; (d) *Grigelis semirugosus*; (e) *Lenticulina denticulifera*; (f) *Pseudoglandulina comatula*; (g) *Vaginulinopsis baggi*.

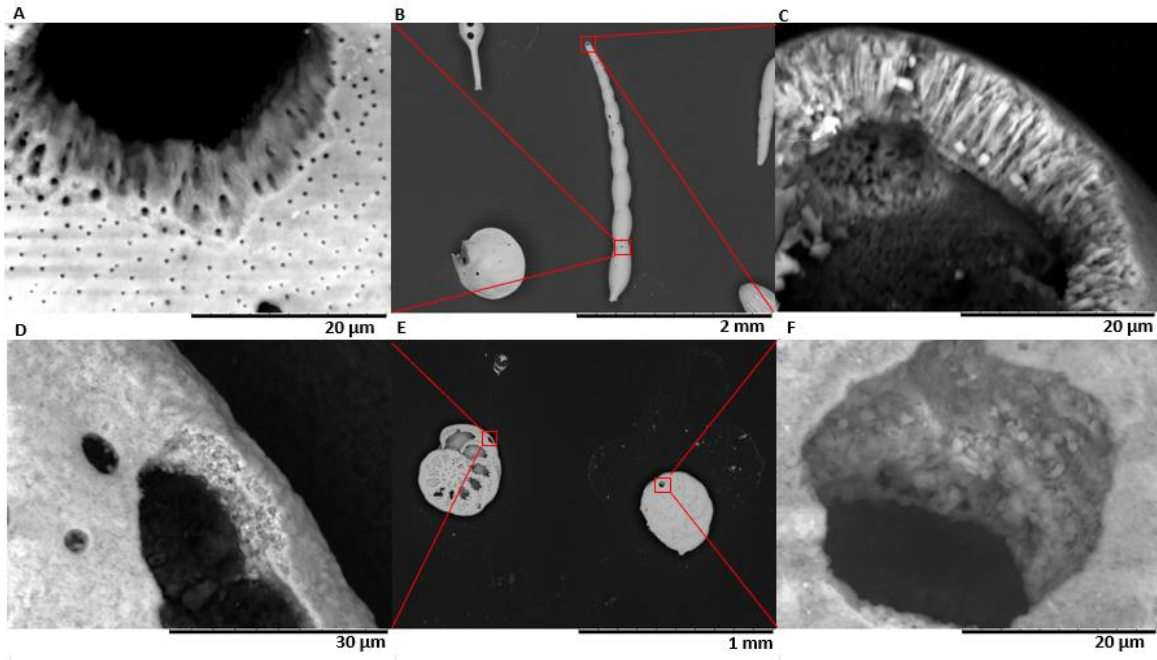

Figure S6: A, B, C *Dentalina* spp. (Nodosariida) A and C cross-section test structure; D, E, F *Planulina* sp. (Rotaliida), D and F, cross-section test structure.
